# Supplementary material
Source: MDPI journal article supplement (https://www.mdpi.com/2072-4292/15/19/4672)
Supplement: s1 [file s1]

### Supplementary Data

Table S1: Drone **acquired data VIs** used in literature.

| <b><u>UAV Data Vegetation indices</u></b>            | <b><u>References</u></b>                                                  |
|------------------------------------------------------|---------------------------------------------------------------------------|
| Normalized difference vegetation index (NDVI)        | [1], [2], [3], [4], [5], [6], [7], [8], [9], [10], [11], [12], [13], [14] |
| Normalized difference red edge index (NDRE)          | [6], [8], [9], [11]                                                       |
| Renormalized difference vegetation index (RDVI)      | [8], [11]                                                                 |
| Normalized difference water index (NDWI)             | [8]                                                                       |
| Maximum difference water index (MDWI)                | [8]                                                                       |
| Excess green index (EGI)                             | [1], [4], [13]                                                            |
| Enhanced vegetation index (EVI2)                     | [2], [15]                                                                 |
| green difference vegetation index (GDVI)             | [10], [11], [14]                                                          |
| Difference Vegetation Index                          | [11]                                                                      |
| Green normalized difference vegetation index (GNDVI) | [2], [9], [10], [11], [16], [14]                                          |
| Normalized Green red difference index (NGRDI)        | [8]                                                                       |
| Simple ratio (SR)                                    | [2], [10], [11], [14]                                                     |
| Modified Simple Ratio Index (MSRI)                   | [10], [11]                                                                |
| Modified SAVI 2                                      | [11]                                                                      |
| Soil-adjusted Vegetation Index (SAVI)                | [11]                                                                      |
| Optimized Soil-adjusted Vegetation Index (OSAVI)     | [15], [8]                                                                 |
| Green and Red ratio Vegetation Index (GRVI)          | [9]                                                                       |
| Red-Edge Simple Ratio (SRre)                         | [10]                                                                      |
| Normalized difference photosynthetic vigor ratio     | [5]                                                                       |
| TCARI                                                | [8]                                                                       |
| Nutritional nitrogen index (NNI)                     | [17]                                                                      |
| Crop water stress index                              | [8]                                                                       |
| Chlorophyll Vegetation Index                         | [11]                                                                      |
| Green Chlorophyll Index                              | [11]                                                                      |
| Chlorophyll concentration index                      | [18]                                                                      |
| Chlorophyll reflectance red-edge index               | [12]                                                                      |
| Modified Chlorophyll Absorption Index                | [11]                                                                      |
| Crop water stress index (CWSI).                      | [19]                                                                      |
| Moisture stress index                                | [8]                                                                       |
| Photochemical reflectance index                      | [8]                                                                       |
| canopy difference                                    | [19]                                                                      |
| B1/B2                                                | [10]                                                                      |
| <b>Green leaf index</b>                              | <b>[13]</b>                                                               |
| <b>Visible atmospherically resistant index</b>       | <b>[13]</b>                                                               |

Table S2: Satellite data acquired VI's used in literature

| <b>Satellite (Vegetation indices)</b>                | <b>References</b>                                                      |
|------------------------------------------------------|------------------------------------------------------------------------|
| NDVI                                                 | [20], [21], [22], [23], [24], [25], [26], [27], [28], [29], [30], [31] |
| DEV NDVI                                             | [20]                                                                   |
| normalized difference red edge index                 | [21]                                                                   |
| enhanced vegetation index (EVI2)                     | [30], [32], [33]                                                       |
| Difference Vegetation Index                          | [24]                                                                   |
| green normalized difference vegetation index (GNDVI) | [25], [26], [31]                                                       |
| simple ratio (SR)                                    | [21]                                                                   |
| Ratio Vegetation Index (RVI)                         | [24]                                                                   |
| Soil-adjusted Vegetation Index (SAVI)                | [23], [25], [26], [28]                                                 |
| Vegetation Condition Index (VCI)                     | [20]                                                                   |
| Simple ratio red edge                                | [21]                                                                   |
| TCARI                                                | [21]                                                                   |
| nutritional nitrogen index (NNI)                     | [17]                                                                   |
| Chlorophyll Vegetation Index                         | [21]                                                                   |
| Green Chlorophyll Index                              | [21]                                                                   |
| chlorophyll reflectance red-edge index               | [21]                                                                   |
| Modified Chlorophyll Absorption Index                | [21]                                                                   |
| Triangular vegetation index (TVI)                    | [21]                                                                   |
| modified triangular index 2                          | [21]                                                                   |
| Normalized Difference Water Index                    | [30], [31]                                                             |

Table S3: Drone platforms used in mapping specific NUS crop attributes other than stomatal conductance.

| <b>Drone sensor type</b>         | <b>Crop Type</b>         | <b>Research domain</b>                                                        | <b>Reference</b> |
|----------------------------------|--------------------------|-------------------------------------------------------------------------------|------------------|
| DJI Phantom 4 Pro, M600 Pro      | Palmer amaranth          | Modelling, Phenology/growth, Monitoring, Regression and prediction            | [1]              |
| DJI Phantom 4 Pro                | Bambara groundnut        | Modelling, Production/crop yield, Phenology/growth, Regression and prediction | [2]              |
| MikroKopter JR11X                | Sorghum & Amaranth       | Modelling, Phenology/growth, Regression and prediction                        | [3]              |
| DJI S1000 UAV, DJI Phantom 4 Pro | Amaranthus               | Classification, Phenology/growth                                              | [34]             |
| DJI Phantom 4 Pro                | Cotton & Palmer amaranth | Classification, Land suitability, Production/crop yield, Phenology/growth,    | [4]              |
| Quadcopter G-Q45                 | Ruzi grass & Millet      | Modelling, Production/crop yield, Phenology/growth, Regression and prediction | [17]             |
| Hexacopter UAV, M600 Pro         | Tumeric                  | Modelling, Physiology, Phenology/growth, Regression and prediction            | [18]             |

|                     |                   |                                                                                                    |      |
|---------------------|-------------------|----------------------------------------------------------------------------------------------------|------|
|                     | Sorghum           | Phenotyping, growth, production                                                                    | [35] |
| DJI Phantom 4 Pro   | Bambara groundnut | Modelling, Phenotyping/crop genetics, Physiology, Phenology/growth, Regression and prediction      | [36] |
| DJI 100             | Alfalfa           | Phenotyping/crop genetics, Phenology/growth                                                        | [9]  |
| Parrot Bebop 2 Pro, | Chickpea & Lentil | Classification, Physiology and crop vigour, Phenology/growth                                       | [10] |
| Sensefly eBee RTK   | Red clover        | Land suitability, Modelling, Phenology/growth                                                      | [14] |
| DJI Phantom 4 Pro   | Legumes           | Modelling, Climate adaptation, Production/crop yield, Physiology, Phenology/growth.                | [11] |
| Octocopter          | Dry bean          | Phenotyping/crop genetics, Production/crop yield, Phenology/growth                                 | [16] |
| DJI Inspire 1       | Sweet potato      | Phenotyping/crop genetics, Climate adaptation, Production/crop yield, Physiology, Phenology/growth | [12] |
| Cessna              | Taro              | Classification, Land suitability, Production/crop yield                                            | [37] |
| DJI S1000 UAV       | Sweet potato      | Modelling, Production/crop yield, Physiology, Phenology/growth                                     | [38] |
| Mavic Mini          | Chickpea          | Modelling, Climate adaptation, Physiology, Phenology/growth, Regression and prediction             | [13] |

Table S4: Drone platforms used to map the spatial distribution of various NUS crops.

| <u>Drone used in study</u> | <u>Crop assessed</u>                                                                                                                             |
|----------------------------|--------------------------------------------------------------------------------------------------------------------------------------------------|
| Octocopter                 | Dry bean [16]                                                                                                                                    |
| Hexacopter UAV             | Tumeric [18]                                                                                                                                     |
| Cessna                     | Taro [37]                                                                                                                                        |
| Parrot Bebop 2 Pro         | Chickpea and Lentil [10]                                                                                                                         |
| DJI Inspire 1              | Sweet potato [12]                                                                                                                                |
| DJI 100                    | Alfalfa (Medicago sativa L) [9]                                                                                                                  |
| DJI S1000 UAV              | Amaranthus [34], Sweet potato[38]                                                                                                                |
| DJI Phantom 4 Pro          | Palmer amaranth [1], Bamara groundut [2], Amaranthus [34], Palmer amaranth (Amaranthus palmeri S. Watson) [4] , Bamara groundut [7] Legume [11]. |
| M600 Pro                   | Palmer amaranth [1], Tumeric [18]                                                                                                                |
| Mavic Mini                 | Chickpea [13]                                                                                                                                    |
| quadcopter G-Q45           | Ruzi grass and Millet [17]                                                                                                                       |
| Sensefly eBee RTK          | Red clover [14]                                                                                                                                  |
| MikroKopter JR11X          | sorghum and amaranth [3]                                                                                                                         |

Table S5: Satellite borne sensors used to assess NUS crops.

| <b>Reference</b> | <b>Satellite Sensor</b> | <b>Crop type</b>                                                                    | <b>Research domain</b>                                                                                                            |
|------------------|-------------------------|-------------------------------------------------------------------------------------|-----------------------------------------------------------------------------------------------------------------------------------|
| [28]             | Landsat Thematic mapper | Chickpea, lentil, vetch                                                             | Classification, Regression and prediction, Climate adaptation, Production/crop yield, Phenology/growth, Regression and prediction |
| [22]             | Landsat 7               | Sorghum                                                                             | Regression and prediction, Land suitability, Climate adaptation, Physiology and crop vigour, Phenology                            |
| [20]             | MODIS                   | Teff, haricot beans, sweet potato (Ipomoea batatas) and taro (Colocasia esculenta). | Land suitability, Modelling, Climate adaptation, Production/crop yield, Phenology, Regression and prediction                      |
| [33]             | MODIS                   | C3 and C4 crops                                                                     | Regression and prediction, Land suitability, Modelling, Climate adaptation, Production                                            |
| [17]             | Planet                  | Ruzi grass & Millet                                                                 | Modelling, Production/crop yield, Phenology/growth, regression                                                                    |
| [17]             | Sentinel-2              | Ruzi grass & Millet                                                                 | Modelling, Production/crop yield, Phenology/growth, regression                                                                    |
| [21]             | Sentinel-2              | Cotton & Sugar beet                                                                 | Modelling, Production/crop yield, Physiology, Phenology/growth, regression                                                        |
| [23]             | Sentinel-2              | Sorghum, alfalfa,                                                                   | Land suitability, Modelling, Climate adaptation, Production/crop yield, Phenology, Regression and prediction                      |
| [39]             | Sentinel-2              | Chickpea, faba bean, field pea, lentil, vetch                                       | Classification, land suitability, Phenology/growth                                                                                |
| [25]             | Sentinel-2              | Sweet potato                                                                        | Phenotyping, Climate adaptation, Phenology/growth, Regression, and prediction                                                     |
| [26]             | Sentinel-2              | Sweet potato                                                                        | Classification, Regression and prediction, Climate adaptation, Production/crop yield, Phenology                                   |
| [27]             | Sentinel-2              | Legumes                                                                             | Modelling, Climate adaptation, Physiology, Phenology/growth, regression                                                           |
| [30]             | Sentinel-2              | Sorghum, Alfalfa, and dry beans                                                     | Classification, land suitability, Climate adaptation, Phenology/growth                                                            |
| [29]             | Worldview 2             | Sweet potato                                                                        | Classification, land suitability, Climate adaptation, Phenology/growth                                                            |
| [24]             | LiDAR                   | Sorghum                                                                             | Phenotyping/crop genetics, Phenology                                                                                              |
| [40]             | LiDAR                   | Cassava                                                                             | Regression and prediction, Phenotyping/crop genetics, Physiology, Phenology,                                                      |

|      |                                                |                 |                                                                                         |
|------|------------------------------------------------|-----------------|-----------------------------------------------------------------------------------------|
| [41] | LiDAR                                          | Sweet potato    | Regression and prediction, Physiology, Phenology,                                       |
| [33] | Global Ozone Monitoring Experiment-2 satellite | C3 and C4 crops | Regression and prediction, Land suitability, Modelling, Climate adaptation, Production  |
| [31] | Landsat 8                                      | Alfalfa         | Classification,, Land suitability, Production/crop yield, Climate adaptation, Phenology |

**Table S6: Satellites Datasets used by different institution to assess various research domains of NUS.**

| Satellite sensor articles and Institutions |                                                                                                                                                                |             |           |                                                                                     |                                                                                                                                                                                                                                                                                       |
|--------------------------------------------|----------------------------------------------------------------------------------------------------------------------------------------------------------------|-------------|-----------|-------------------------------------------------------------------------------------|---------------------------------------------------------------------------------------------------------------------------------------------------------------------------------------------------------------------------------------------------------------------------------------|
| Author                                     | Article title                                                                                                                                                  | Publication | Area      | Crop Type                                                                           | Institutions                                                                                                                                                                                                                                                                          |
| [20]                                       | Assessing the spatio-temporal variability of NDVI and VCI as indices of crops productivity in Ethiopia: a remote sensing approach                              | 2021        | Ethiopia  | Teff, haricot beans, sweet potato (Ipomoea batatas) and taro (Colocasia esculenta). | Copperbelt University, Kitwe, Zambia; b Institute of Climate and Society, Mekelle University, Mekelle, Ethiopia. University of Nigeria, Nsukka, Enugu, Nigeria. Ghent University, Ghent, Belgium.                                                                                     |
| [17]                                       | Nitrogen variability assessment of pasture fields under an integrated crop-livestock system using UAV, PlanetScope, and Sentinel-2 data                        | 2022        | Brazil    | Ruzi grass & Millet                                                                 | Federal Institute of Education, Science and Technology of Alagoas, 57120-000 Satuba, Alagoas, Brazil.. University of Campinas, 13083-896 Campinas, Sao Paulo, Brazil.                                                                                                                 |
| [21]                                       | Remotely sensed vegetation indices for crop nutrition mapping                                                                                                  | 2020        | Iran      | Cotton & Sugar beet                                                                 | Shahid Rajaei Teacher Training University, Tehran, 16785-136, Iran. E-mail: a_sharifi@sru.ac.ir                                                                                                                                                                                       |
| [23]                                       | Optimized land use through integrated land suitability and gis approach in west el-minia governorate, upper Egypt                                              | 2021        | Egypt     | Sorghum & alfalfa,                                                                  | Ain-Shams University, Cairo 11241, Egypt. National Authority for Remote Sensing and Space Sciences, Cairo 11769, Egypt; National Authority for Remote Sensing and Space Sciences (NARSS),                                                                                             |
| [22]                                       | Water requirement and crop coefficients of sorghum in apodi plateau [Necessidade hídrica e coeficientes de cultivo do sorgo nas condições da chapada do apodi] | 2021        | Brazil    | Sorghum                                                                             | Research developed at Empresa de Pesquisa Agropecuária do Rio Grande do Norte, Apodi, RN, Brazil Faculdade UNINASSAU, Caruaru, PE, Brazil Universidade Federal Rural do Semi-Árido/Centro de Ciências Agrárias/Departamento de Ciências Agrônômicas e Florestais, Mossoró, RN, Brazil |
| [39]                                       | Needle in a haystack: Mapping rare and infrequent crops using satellite imagery and data balancing methods                                                     | 2019        | Australia | Chickpea, faba bean, field pea, lentil, vetch                                       | CSIRO Agriculture & Food, St Lucia, QLD 4067, Australia CSIRO Data61, Docklands, VIC 3008, Australia CSIRO Agriculture & Food, Floreat, WA 6014, Australia                                                                                                                            |

|      |                                                                                                                                              |      |              |                                |                                                                                                                                                                                                                                                                                                |
|------|----------------------------------------------------------------------------------------------------------------------------------------------|------|--------------|--------------------------------|------------------------------------------------------------------------------------------------------------------------------------------------------------------------------------------------------------------------------------------------------------------------------------------------|
| [24] | Crop 3D—a LiDAR based platform for 3D high-throughput crop phenotyping                                                                       | 2018 | China        | Sorghum                        | University of Chinese Academy of Sciences, Beijing China.<br>Beijing Normal University, Beijing 100875, China.                                                                                                                                                                                 |
| [33] | Improving the monitoring of crop productivity using spaceborne solar-induced fluorescence                                                    | 2016 | USA          | C3 and C4 crops                | Stanford University, Stanford, CA 94305, USA<br>Nanjing University, Nanjing 210023, China,<br>German Research Center for Geosciences (GFZ), Telegrafenberg A17, 14473 Potsdam, Germany,<br>National Aeronautics and Space Administration Goddard Space Flight Center, Greenbelt, MD 20771, USA |
| [25] | Use of remote sensing to characterize the phenological development and to predict sweet potato yield in two growing seasons                  | 2021 | Brazil       | Sweet potato                   | Sao Paulo State University.<br>Federal University Lavras, Brazil.<br>Taquaritinguense Institute of Higher Education, Brazil                                                                                                                                                                    |
| [26] | Predicting on multi-target regression for the yield of sweet potato by the market class of its roots upon vegetation indices                 | 2021 | Brazil       | Sweet potato                   | Sao Paulo State University.                                                                                                                                                                                                                                                                    |
| [40] | Prediction of aboveground biomass of three cassava (manihot esculenta) genotypes using a terrestrial laser scanner                           | 2021 | Colombia     | Cassava                        | Texas A&M University, College Station, TX, USA<br>International Center for Tropical Agriculture, Santiago de Cali 6713, Colombia                                                                                                                                                               |
| [27] | Application of Sentinel-2A data for pasture biomass monitoring using a physically based radiative transfer model                             | 2018 | England      | Legumes                        | University of Reading, Reading RG6 6UR, UK                                                                                                                                                                                                                                                     |
| [28] | Biophysical and yield information for precision farming from near-real-time and historical Landsat TM images                                 | 2003 | Syria        | Chickpea, lentil, vetch        | Yale University, New Haven.                                                                                                                                                                                                                                                                    |
| [41] | Estimating Leaf Water Content through Low-Cost LiDAR                                                                                         | 2022 | Japan        | Sweet potato                   | Chiba University, 648, Matsudo, Matsudo-shi 271-8510, Japan.                                                                                                                                                                                                                                   |
| [29] | Parcel-level mapping of crops in a smallholder agricultural area: A case of central China using single-temporal VHRS imagery                 | 2020 | China        | Sweet potato,                  | China University of Geosciences (CUG), Wuhan 430074, PR China.<br>University of Connecticut, Storrs, CT 06269, USA.<br>Key Laboratory of Rule of Law Research, Ministry of Natural Resources, Wuhan 430074, PR China                                                                           |
| [31] | Crop type detection using an object-based classification method and multi-temporal Landsat satellite images, Paddy and Water Environment     | 2022 | Iran         | Alfalfa                        | Department of Water Resources Study and Research, Water Research Institute, Tehran, Iran                                                                                                                                                                                                       |
| [30] | Exploring machine learning algorithms for mapping crop types in a heterogeneous agriculture landscape using Sentinel-2 data. A case study of | 2020 | South Africa | Sorghum, Alfalfa and dry beans | Geo-information Division, Institute for soil water and climate, Agricultural Research Council.                                                                                                                                                                                                 |

|  |                                   |  |  |  |                                                                                     |
|--|-----------------------------------|--|--|--|-------------------------------------------------------------------------------------|
|  | Free State Province, South Africa |  |  |  | University of Witwatersrand. Private Bag x3, Wits 2050, Johannesburg, South Africa. |
|--|-----------------------------------|--|--|--|-------------------------------------------------------------------------------------|

Table S7: Institutions that utilized UAV borne sensors to assess NUS crops.

| UAV articles and Institutions |                                                                                                                                                           |             |               |                                                        |                                                                                                                                                                                                                       |
|-------------------------------|-----------------------------------------------------------------------------------------------------------------------------------------------------------|-------------|---------------|--------------------------------------------------------|-----------------------------------------------------------------------------------------------------------------------------------------------------------------------------------------------------------------------|
| Author                        | Article title                                                                                                                                             | Publication | Area          | Crop Type                                              | Institutions                                                                                                                                                                                                          |
| [1]                           | Seed rain potential in late-season weed escapes can be estimated using remote sensing                                                                     | 2021        | United States | Palmer amaranth                                        | Texas A&M University, College Station, TX, USA;                                                                                                                                                                       |
| [2]                           | The feasibility of using a low-cost near-infrared, sensitive, consumer-grade digital camera mounted on a commercial UAV to assess Bambara groundnut yield | 2022        | Malaysia      | Bamara groundnut                                       | University of Nottingham Malaysia Campus, Semenyih, Malaysia.<br>The University of Adelaide, Glen Osmond, Australia.<br>Charles Darwin University, Casuarina, Australia.<br>University of Nottingham, Nottingham, UK. |
| [3]                           | Assessment of Weed Classification Using Hyperspectral Reflectance and Optimal Multispectral UAV Imagery                                                   | 2021        | Australia     | sorghum and amaranth                                   | The University of Queensland, Gatton Campus, QLD 4343, Australia.<br>University Putra Malaysia, Serdang 43400, Selangor, Malaysia                                                                                     |
| [34]                          | Field identification of weed species and glyphosate-resistant weeds using high resolution imagery in early growing season                                 | 2020        | USA           | Amaranth                                               | Shiraz University, Shiraz, Iran.<br>North Dakota State University, Fargo, ND, USA.<br>Montana State University, Bozeman, MT, USA.<br>Yazd University, Yazd, Iran                                                      |
| [4]                           | Mapping and Estimating Weeds in Cotton Using Unmanned Aerial Systems-Borne Imagery                                                                        | 2020        | United States | Cotton, Palmer amaranth (Amaranthus palmeri S. Watson) | Texas A&M University, College Station, TX 77843, USA.                                                                                                                                                                 |
| [17]                          | Nitrogen variability assessment of pasture fields under an integrated crop-livestock system using UAV, PlanetScope, and Sentinel-2 data                   | 2022        | Brazil        | Ruzi grass & Millet                                    | Federal Institute of Education, Science and Technology of Alagoas, 57120-000 Satuba, Alagoas, Brazil.<br>University of Campinas, 13083-896 Campinas, Sao Paulo, Brazil.                                               |
| [35]                          | Corn and sorghum phenotyping using a fixed-wing UAV-based remote sensing system                                                                           | 2016        | United States | Sorghum                                                |                                                                                                                                                                                                                       |

|      |                                                                                                                                                             |      |               |                                      |                                                                                                                                                                                                                                                                             |
|------|-------------------------------------------------------------------------------------------------------------------------------------------------------------|------|---------------|--------------------------------------|-----------------------------------------------------------------------------------------------------------------------------------------------------------------------------------------------------------------------------------------------------------------------------|
| [7]  | Use of Unmanned Aerial Vehicles (UAVs) Imagery in Phenotyping of Bambara Groundnut                                                                          | 2020 | Selangor      | Bambara groundnut                    | Semenyih, Selangor, Malaysia.<br>University of Nottingham Malaysia.<br>University of Reading, Early Gate, Reading, UK                                                                                                                                                       |
| [9]  | Phenomics-Assisted Selection for Herbage Accumulation in Alfalfa ( <i>Medicago sativa</i> L.)                                                               | 2021 | United States | Alfalfa ( <i>Medicago sativa</i> L.) | University of Florida, Gainesville, FL, United States.<br>EMBRAPA-ACRE, Rio Branco, Brazil.                                                                                                                                                                                 |
| [10] | Drone RGB Images as a Reliable Information Source to Determine Legumes Establishment Success                                                                | 2021 | Spain         | Chickpea & Lentil                    | Universitat Politècnica de València.<br>Instituto Madrileño de Investigación y Desarrollo Rural, Agrario y Alimentario (IMIDRA), Finca “El Encin”.<br>Areaverde MG Projects SL.<br>C/Oña, 43, 28933 Madrid, Spain.                                                          |
| [14] | The Application of an Unmanned Aerial System and Machine Learning Techniques for Red Clover-Grass Mixture Yield Estimation under Variety Performance Trials | 2021 | Estonia       | Red clover                           | Estonian University of Life Sciences, Kreutzwaldi 5, EE-51006 Tartu, Estonia.<br>University of Brighton, Lewes Road, Brighton BN2 4JG, UK.<br>Agricultural Research Center, 4/6 Teaduse St., 75501 Saku, Estonia.<br>National Chung Hsing University, Taichung 402, Taiwan. |
| [11] | Prediction of Biomass and N Fixation of Legume-Grass Mixtures Using Sensor Fusion                                                                           | 2021 | Germany       | Legume                               | Universität Kassel, Witzenhausen, Germany                                                                                                                                                                                                                                   |
| [16] | High-throughput field phenotyping in dry bean using small unmanned aerial vehicle based multispectral imagery                                               | 2018 | United States | Dry bean                             | Washington State University, United States.<br><br>University of Missouri, 211 Agricultural Engineering Building, Columbia, MO, United States.<br>USDA-ARS, Grain Legume Genetics and Physiology Research Unit, 24106 N. Bunn Rd., Prosser, WA, United States               |
| [12] | Phenotyping of productivity and resilience in sweetpotato under water stress through UAV-based multispectral and thermal imagery in Mozambique              | 2021 | Mozambique    | Sweet potato                         | International Potato Center (CIP), Lima, Peru<br>Universidad Nacional Agraria La Molina (UNALM), Lima, Peru.<br>International Potato Center (CIP), Maputo, Mozambique.                                                                                                      |



|      |                                                                                                                              |      |               |              |                                                                                                                                                                                                                                                                                                                             |
|------|------------------------------------------------------------------------------------------------------------------------------|------|---------------|--------------|-----------------------------------------------------------------------------------------------------------------------------------------------------------------------------------------------------------------------------------------------------------------------------------------------------------------------------|
|      |                                                                                                                              |      |               |              | International Potato Center (CIP), Nairobi, Kenya.                                                                                                                                                                                                                                                                          |
| [37] | Mapping wild taro with color-infrared aerial photography and image processing                                                | 2007 | United States | Taro         | USDA-ARS, Integrated Farming and Natural Resources Research Unit, 2413 E. Highway 83, Weslaco.                                                                                                                                                                                                                              |
| [38] | Estimation of ground surface and accuracy assessments of growth parameters for a sweet potato community in ridge cultivation | 2019 | Japan         | Sweet potato | The University of Tokyo, Graduate School of Agricultural and Life Sciences, 1-1-1 Yayoi, Bunkyo, Tokyo 113-8657, Japan.<br>National Institute for Environmental Studies, 16. Takasaki University of Health and Welfare, 54 Nakaorui-machi, Takasaki, Gunma 370-0033, Japan.                                                 |
| [13] | Uav-Based Imaging for Prediction of Chickpea Crop Biophysical Parameters and Yield                                           | 2022 | Israel        | Chickpea     | Newe Ya'ar Research Center, Agricultural Research Organization (ARO) - Volcani Center, Ramat Yishay 30095, Israel.<br>The Hebrew University of Jerusalem, Rehovot 7610001, Israel.<br>Field Crops and Natural Resources Department, Agricultural Research Organization (ARO) – Gilat Research Center, Gilat 8531100, Israel |
| [42] | Classifying Breadfruit Tree using Artificial Neural Networks                                                                 | 2018 | China         | Breadfruit   | Technological Institute of the Philippines, Manila Philippines.                                                                                                                                                                                                                                                             |



Figure:S2 Countries which assessed various NUS crops.

## References

1. Kutugata, M.; Hu, C.; Sapkota, B.; Bagavathiannan, M. Seed rain potential in late-season weed escapes can be estimated using remote sensing. *Weed Sci.* **2021**, *69*, 653–659.
2. Jewan, S.Y.Y.; Pagay, V.; Billa, L.; Tyerman, S.D.; Gautam, D.; Sparkes, D.; Chai, H.H.; Singh, A. The feasibility of using a low-cost near-infrared, sensitive, consumer-grade digital camera mounted on a commercial UAV to assess Bambara groundnut yield. *Int. J. Remote Sens.* **2022**, *43*, 393–423. <https://doi.org/10.1080/01431161.2021.1974116>.
3. Che'Ya, N.N.; Dunwoody, E.; Gupta, M. Assessment of Weed Classification Using Hyperspectral Reflectance and Optimal Multispectral UAV Imagery. *Agronomy* **2021**, *11*, 1435. <https://doi.org/10.3390/agronomy11071435>.
4. Sapkota, B.; Singh, V.; Cope, D.; Valasek, J.; Bagavathiannan, M. Mapping and Estimating Weeds in Cotton Using Unmanned Aerial Systems-Borne Imagery. *Agriengineering* **2020**, *2*, 24. <https://doi.org/10.3390/agriengineering2020024>.
5. Huang, Y.B.; Reddy, K.N.; Fletcher, R.S.; Pennington, D. UAV Low-Altitude Remote Sensing for Precision Weed Management. *Weed Technol.* **2018**, *32*, 2–6. <https://doi.org/10.1017/wet.2017.89>.
6. Li, L.; Zheng, X.; Zhao, K.; Li, X.; Meng, Z.; Su, C. Potential Evaluation of High Spatial Resolution Multi-Spectral Images Based on Unmanned Aerial Vehicle in Accurate Recognition of Crop Types. *J. Indian Soc. Remote Sens.* **2020**, *48*, 1471–1478.
7. Suhairi, T.A.S.T.M.; Sinin, S.S.M.; Wimalasiri, E.M.; Nizar, N.M.M.; Tharmandran, A.S.; Jahanshiri, E.; Gregory, P.J.; Azam-Ali, S.N. Use of Unmanned Aerial Vehicles (UAVs) Imagery in Phenotyping of Bambara Groundnut. *J. Agric. Sci.* **2020**, *12*. <https://doi.org/10.5539/jas.v12n6p12>
8. Awais, M.; Li, W.; Cheema, M.; Zaman, Q.; Shaheen, A.; Aslam, B.; Zhu, W.; Ajmal, M.; Faheem, M.; Hussain, S. UAV-based remote sensing in plant stress imagine using high-resolution thermal sensor for digital agriculture practices: A meta-review. *Int. J. Environ. Sci. Technol.* **2022**, *20*, 1135–1152.
9. Biswas, A.; Andrade, M.H.M.L.; Acharya, J.P.; de Souza, C.L.; Lopez, Y.; De Assis, G.; Shirbhate, S.; Singh, A.; Munoz, P.; Rios, E.F. Phenomics-Assisted Selection for Herbage Accumulation in Alfalfa (*Medicago sativa* L.). *Front. Plant Sci.* **2021**, *12*, 756768.
10. Parra, L.; Mostaza-Colado, D.; Yousfi, S.; Marin, J.F.; Mauri, P.V.; Lloret, J. Drone RGB images as a reliable information source to determine legumes establishment success. *Drones* **2021**, *5*, 79.
11. Grüner, E.; Astor, T.; Wachendorf, M. Prediction of biomass and N fixation of legume–grass mixtures using sensor fusion. *Front. Plant Sci.* **2021**, *11*, 603921.
12. Ramírez, D.A.; Grüneberg, W.; Andrade, M.I.; De Boeck, B.; Loayza, H.; Makunde, G.S.; Ninanya, J.; Rinza, J.; Heck, S.; Campos, H. Phenotyping of productivity and resilience in sweetpotato under water stress through UAV-based multispectral and thermal imagery in Mozambique. *J. Agron. Crop Sci.* **2023**, *209*, 41–55.
13. Lati, R.; Avneri, A.; Aharon, S.; Atsmon, G.; Smirnov, E.; Sadeh, R.; Abbo, S.; Peleg, Z.; Herrmann, I.; Bonfil, D.J. Uav-Based Imaging for Prediction of Chickpea Crop Biophysical Parameters and Yield. *Available at SSRN 4123863*.
14. Li, K.-Y.; Burnside, N.G.; Sampaio de Lima, R.; Villoslada Peciña, M.; Sepp, K.; Yang, M.-D.; Raet, J.; Vain, A.; Selge, A.; Sepp, K. The application of an unmanned aerial system and machine learning techniques for red clover-grass mixture yield estimation under variety performance trials. *Remote Sens.* **2021**, *13*, 1994.
15. Sobejano-Paz, V.; Mikkelsen, T.N.; Baum, A.; Mo, X.; Liu, S.; Köppl, C.J.; Johnson, M.S.; Gulyas, L.; García, M. Hyperspectral and thermal sensing of stomatal conductance, transpiration, and photosynthesis for soybean and maize under drought. *Remote Sens.* **2020**, *12*, 3182.
16. Sankaran, S.; Zhou, J.; Khot, L.R.; Trapp, J.J.; Mndolwa, E.; Miklas, P.N. High-throughput field phenotyping in dry bean using small unmanned aerial vehicle based multispectral imagery. *Comput. Electron. Agric.* **2018**, *151*, 84–92.
17. Pereira, F.d.S.; de Lima, J.; Freitas, R.; Dos Reis, A.A.; do Amaral, L.R.; Figueiredo, G.K.D.A.; Lamparelli, R.A.; Magalhães, P.S.G. Nitrogen variability assessment of pasture fields under an integrated crop-livestock system using UAV, PlanetScope, and Sentinel-2 data. *Comput. Electron. Agric.* **2022**, *193*, 106645.
18. Singhal, G.; Bansod, B.; Mathew, L.; Goswami, J.; Choudhury, B.; Raju, P. Estimation of leaf chlorophyll concentration in turmeric (*Curcuma longa*) using high-resolution unmanned aerial vehicle imagery based on kernel ridge regression. *J. Indian Soc. Remote Sens.* **2019**, *47*, 1111–1122.

19. Awais, M.; Li, W.; Cheema, M.; Hussain, S.; Shaheen, A.; Aslam, B.; Liu, C.; Ali, A. Assessment of optimal flying height and timing using high-resolution unmanned aerial vehicle images in precision agriculture. *Int. J. Environ. Sci. Technol.* **2022**, *19*, 2703–2720.
20. Kourouma, J.M.; Eze, E.; Negash, E.; Phiri, D.; Vinya, R.; Girma, A.; Zenebe, A. Assessing the spatio-temporal variability of NDVI and VCI as indices of crops productivity in Ethiopia: A remote sensing approach. *Geomat. Nat. Hazards Risk* **2021**, *12*, 2880–2903. <https://doi.org/10.1080/19475705.2021.1976849>.
21. Sharifi, A. Remotely sensed vegetation indices for crop nutrition mapping. *J. Sci. Food Agric.* **2020**, *100*, 5191–5196. <https://doi.org/10.1002/jsfa.10568>.
22. Lima, J.G.; Espínola, J.; Medeiros, J.F.d.; Viana, P.C.; Maniçoba, R.M. Water requirement and crop coefficients of sorghum in Apodi Plateau. *Rev. Bras. De Eng. Agrícola E Ambient.* **2021**, *25*, 684–688.
23. Zakarya, Y.M.; Metwaly, M.M.; AbdelRahman, M.A.; Metwalli, M.R.; Koubouris, G. Optimized land use through integrated land suitability and GIS approach in West El-Minia Governorate, Upper Egypt. *Sustainability* **2021**, *13*, 12236.
24. Guo, Q.; Wu, F.; Pang, S.; Zhao, X.; Chen, L.; Liu, J.; Xue, B.; Xu, G.; Li, L.; Jing, H. Crop 3D—A LiDAR based platform for 3D high-throughput crop phenotyping. *Sci. China Life Sci.* **2018**, *61*, 328–339.
25. Tedesco, D.; de Oliveira, M.F.; dos Santos, A.F.; Silva, E.H.C.; de Souza Rolim, G.; da Silva, R.P. Use of remote sensing to characterize the phenological development and to predict sweet potato yield in two growing seasons. *Eur. J. Agron.* **2021**, *129*, 126337.
26. Tedesco, D.; de Almeida Moreira, B.R.; Júnior, M.R.B.; Papa, J.P.; da Silva, R.P. Predicting on multi-target regression for the yield of sweet potato by the market class of its roots upon vegetation indices. *Comput. Electron. Agric.* **2021**, *191*, 106544.
27. Punalekar, S.M.; Verhoef, A.; Quaife, T.; Humphries, D.; Bermingham, L.; Reynolds, C. Application of Sentinel-2A data for pasture biomass monitoring using a physically based radiative transfer model. *Remote Sens. Environ.* **2018**, *218*, 207–220.
28. Thenkabail, P. Biophysical and yield information for precision farming from near-real-time and historical Landsat TM images. *Int. J. Remote Sens.* **2003**, *24*, 2879–2904.
29. Zhang, P.; Hu, S.; Li, W.; Zhang, C. Parcel-level mapping of crops in a smallholder agricultural area: A case of central China using single-temporal VHSR imagery. *Comput. Electron. Agric.* **2020**, *175*, 105581.
30. Mazarire, T.T.; Ratshiedana, P.E.; Nyamugama, A.; Adam, E.; Chirima, G. Exploring machine learning algorithms for mapping crop types in a heterogeneous agriculture landscape using Sentinel-2 data. A case study of Free State Province, South Africa. *S. Afr. J. Geomat.* **2020**, *9*, 333–347.
31. Karimi, N.; Sheshangosht, S.; Eftekhari, M. Crop type detection using an object-based classification method and multi-temporal Landsat satellite images. *Paddy Water Environ.* **2022**, *20*, 395–412.
32. Karlson, M.; Ostwald, M.; Bayala, J.; Bazié, H.R.; Ouedraogo, A.S.; Soro, B.; Sanou, J.; Reese, H. The potential of Sentinel-2 for crop production estimation in a smallholder agroforestry landscape, Burkina Faso. *Front. Environ. Sci.* **2020**, *8*, 85.
33. Guan, K.; Berry, J.A.; Zhang, Y.; Joiner, J.; Guanter, L.; Badgley, G.; Lobell, D.B. Improving the monitoring of crop productivity using spaceborne solar-induced fluorescence. *Glob. Change Biol.* **2016**, *22*, 716–726.
34. Shirzadifar, A.; Bajwa, S.; Nowatzki, J.; Bazrafkan, A. Field identification of weed species and glyphosate-resistant weeds using high resolution imagery in early growing season. *Biosyst. Eng.* **2020**, *200*, 200–214.
35. Shi, Y.; Murray, S.C.; Rooney, W.L.; Valasek, J.; Olsenholler, J.; Pugh, N.A.; Henrickson, J.; Bowden, E.; Zhang, D.; Thomasson, J.A. Corn and sorghum phenotyping using a fixed-wing UAV-based remote sensing system. In *Autonomous Air and Ground Sensing Systems for Agricultural Optimization and Phenotyping*; SPIE: Bellingham, WA, USA, 2016; pp. 46–53.
36. Wimalasiri, E.M.; Jahanshiri, E.; Suhairi, T.; Udayangani, H.; Mapa, R.B.; Karunaratne, A.S.; Vidhanarachchi, L.P.; Azam-Ali, S.N. Basic Soil Data Requirements for Process-Based Crop Models as a Basis for Crop Diversification. *Sustainability* **2020**, *12*, 7781. <https://doi.org/10.3390/su12187781>.
37. Everitt, J.; Yang, C.; Davis, M.; Everitt, J.; Davis, M. Mapping wild taro with color-infrared aerial photography and image processing. *J. Aquat. Plant Manag.* **2007**, *45*, 106–110.
38. Teng, P.; Ono, E.; Zhang, Y.; Aono, M.; Shimizu, Y.; Hosoi, F.; Omasa, K. Estimation of ground surface and accuracy assessments of growth parameters for a sweet potato community in ridge cultivation. *Remote Sens.* **2019**, *11*, 1487.
39. Waldner, F.; Chen, Y.; Lawes, R.; Hochman, Z. Needle in a haystack: Mapping rare and infrequent crops using satellite imagery and data balancing methods. *Remote Sens. Environ.* **2019**, *233*, 111375.
40. Adams, T.; Bruton, R.; Ruiz, H.; Barrios-Perez, I.; Selvaraj, M.G.; Hays, D.B. Prediction of Aboveground Biomass of Three Cassava (*Manihot esculenta*) Genotypes Using a Terrestrial Laser Scanner. *Remote Sens.* **2021**, *13*, 1272.

41. Hama, A.; Matsumoto, Y.; Matsuoka, N. Estimating Leaf Water Content through Low-Cost LiDAR. *Agronomy* **2022**, *12*, 1183.
42. Malinao, R.M.L.; Hernandez, A.A. Classifying Breadfruit Tree using Artificial Neural Networks. In Proceedings of the 6th ACM/ACIS International Conference on Applied Computing and Information Technology, Kunming, China, 13–15 June 2018; pp. 27–31.
